# Supplementary material for: Product distribution in the silicatein-catalysed synthesis of polydimethylsiloxane
Source: Royal Society of Chemistry journal article supplement (doi:10.1039/d6cy00067c), 2026-04-02
Supplement: d6cy00067c1.pdf [file d6cy00067c1.pdf]

## Supplementary Information

### Product Distribution in the Silicatein-Catalysed Synthesis of Polydimethylsiloxane

Yuqing Lu,<sup>a,b</sup> Lu Shin Wong<sup>a,b</sup>

<sup>a</sup> Manchester Institute of Biotechnology, University of Manchester, Manchester M1  
7DN, United Kingdom;

<sup>b</sup> Department of Chemistry, University of Manchester, Manchester M13 9PL, United  
Kingdom

\* correspondence: [l.s.wong@manchester.ac.uk](mailto:l.s.wong@manchester.ac.uk)

## Supplementary Results

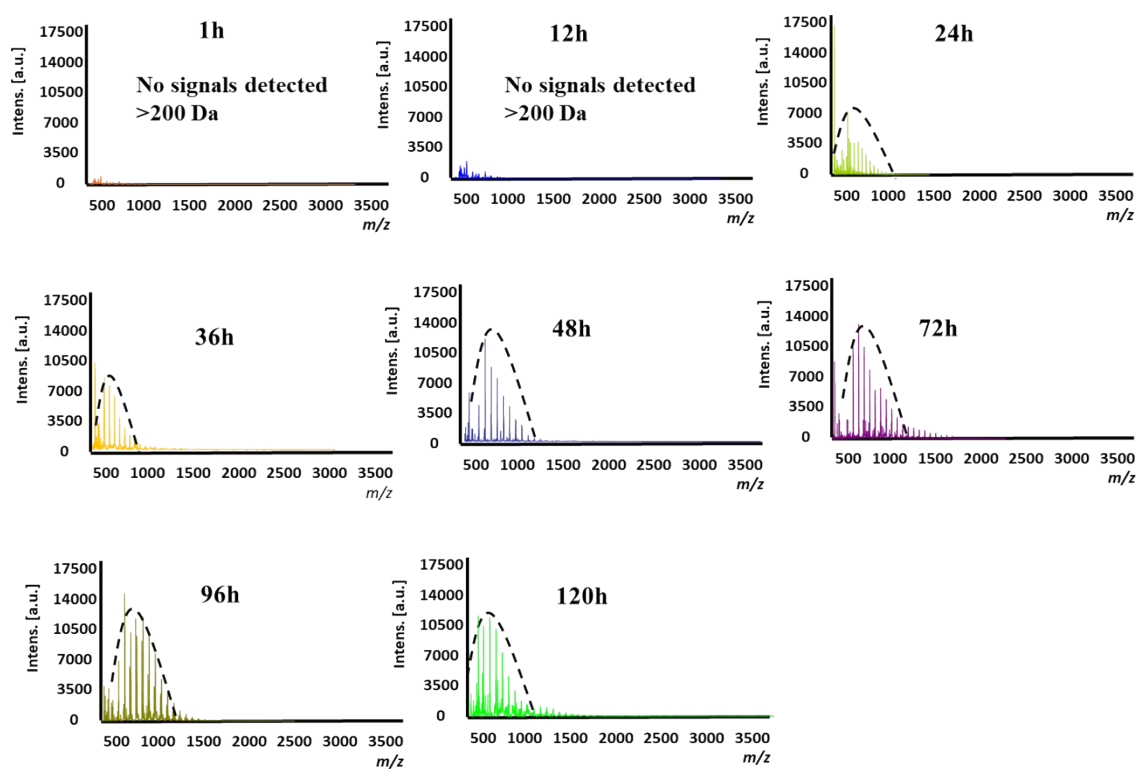

**Figure S1.** MALDI mass spectra of the products from the polymerisation reactions of DMDMS over 1–120 hours in non-enzymatic reactions.

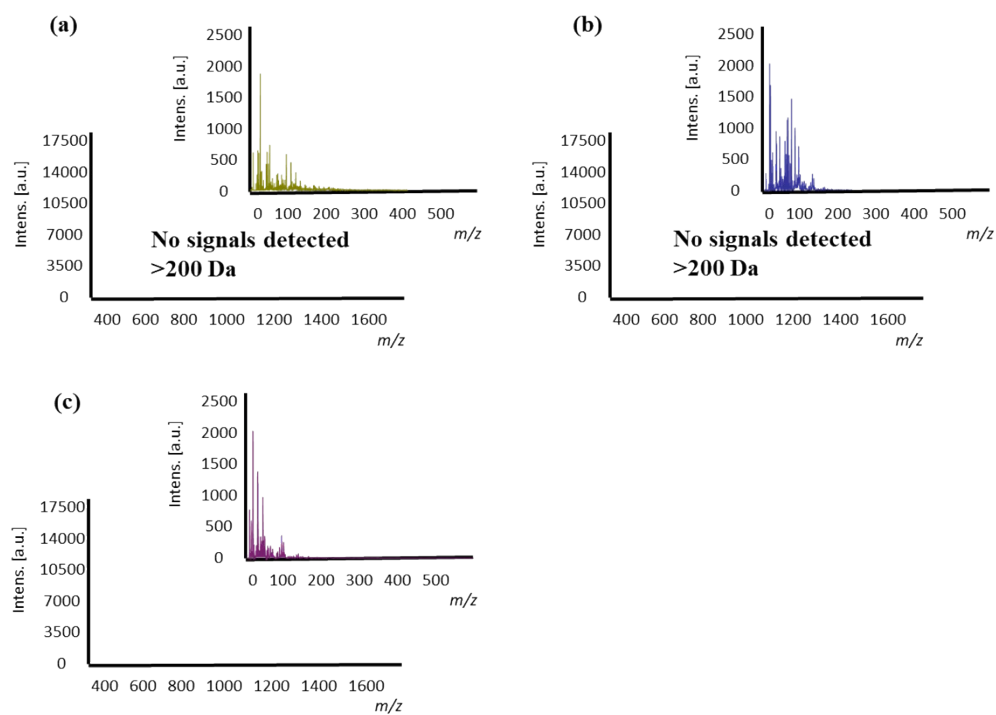

**Figure S2.** MALDI mass spectra for D3 ring-opening polymerisation after 48 hours.

The inset shows the mass spectra in the low  $m/z$  range (0–500) for: (a) the substrate prior to reaction, (b) the control reaction (enzyme omitted), and (c) the fully constituted reaction.

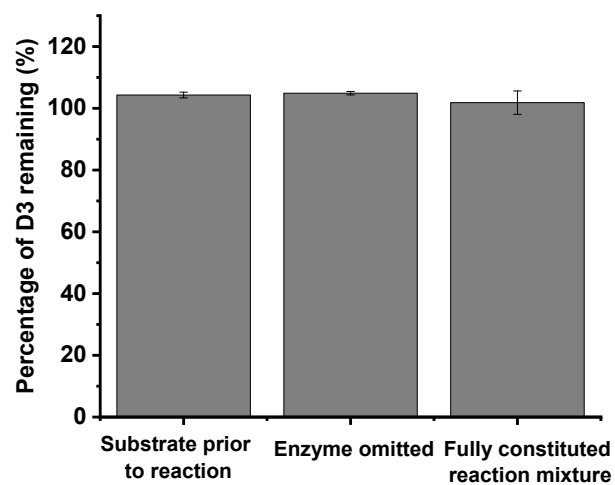

**Figure S3.** The percentage of D3 remaining after ring-opening polymerisation after 48 hours. The error bars indicate standard error of the mean from technical triplicates.

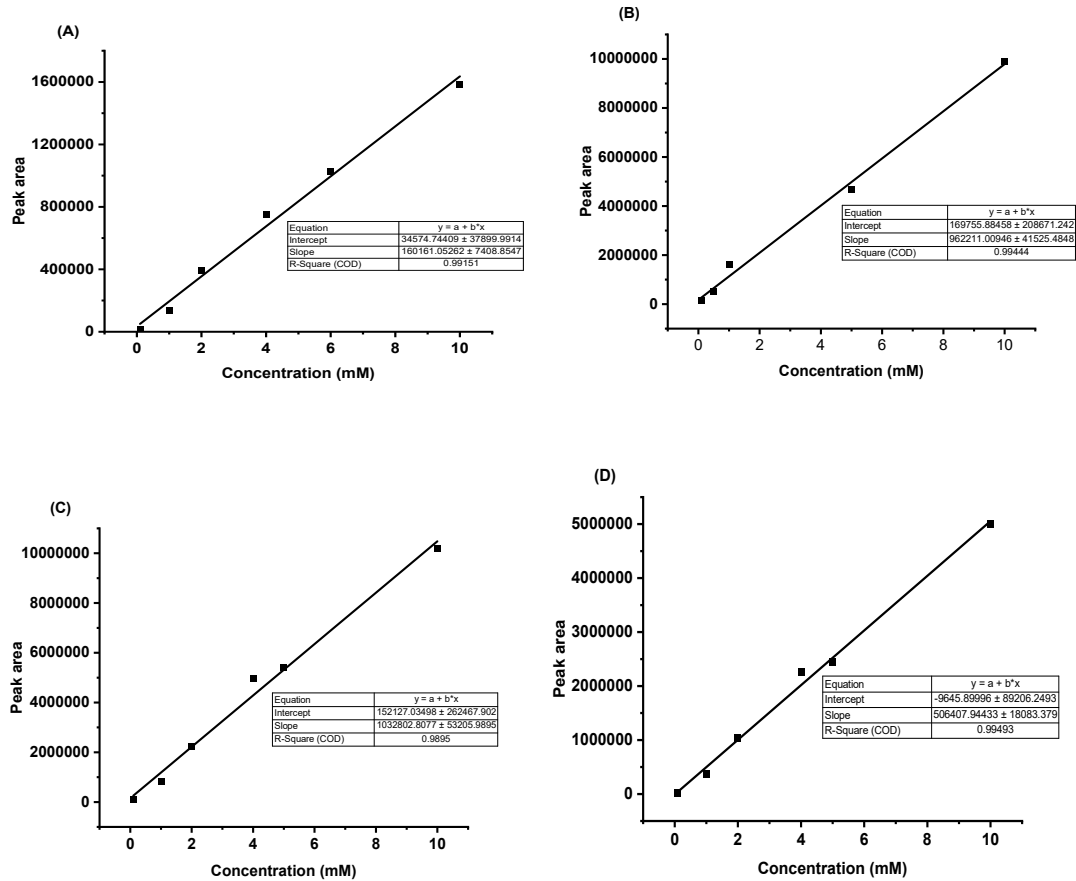

**Figure S4.** GC Calibration plots for product quantification. Calibration graph of peak area against concentration of dimethyldimethoxysilane (A), D3 (B), D4 (C), D5 (D).

**Table S1.** Percentage of consumption of DMDMS and conversion to cyclic siloxanes over time. The net conversion was calculated by the difference between the enzymatic reaction conversion and the non-enzymatic reaction conversion.

| Compound | Time (h) | Consumption (%) |               |           |
|----------|----------|-----------------|---------------|-----------|
|          |          | Enzymatic       | Non-enzymatic | Net       |
| DMDMS    | 1        | ~0              | ~0            | ~0        |
|          | 12       | 21.0±1.1        | 8.6±1.4       | 12.4±1.8  |
|          | 24       | 31.2±0.4        | 9.3±1.0       | 21.9±1.0  |
|          | 36       | 33.1±3.2        | 11.1±1.4      | 22.0±3.5  |
|          | 48       | 36.3±0.8        | 13.1±0.8      | 23.2±1.1  |
|          | 72       | 40.8±1.4        | 14.7±1.0      | 26.1±1.7  |
|          | 96       | 45.7±0.9        | 17.1±0.9      | 28.6±1.3  |
|          | 120      | 49.0±0.7        | 19.0±0.3      | 30.0±0.8  |
|          |          | Conversion (%)  |               |           |
| D3       | 1        | ~0              | ~0            | ~0        |
|          | 12       | 0.2±0.2         | ~0            | 0.20±0.2  |
|          | 24       | 0.6±0.1         | ~0            | 0.6±0.1   |
|          | 36       | 0.9±0.2         | 0.03±0.05     | 0.9±0.2   |
|          | 48       | 1.3±0.2         | 0.2±0.07      | 1.1±0.2   |
|          | 72       | 2.0±0.3         | 0.1±0.06      | 1.9±0.3   |
|          | 96       | 2.2±0.2         | 0.3±0.04      | 1.9±0.2   |
|          | 120      | 2.8±0.4         | 0.5±0.1       | 2.3±0.4   |
| D4       | 1        | ~0              | ~0            | ~0        |
|          | 12       | ~0              | ~0            | ~0        |
|          | 24       | 0.22±0.07       | 0.021±0.02    | 0.19±0.05 |
|          | 36       | 0.68±0.02       | 0.15±0.03     | 0.53±0.05 |
|          | 48       | 1.07±0.06       | 0.23±0.05     | 0.84±0.1  |
|          | 72       | 1.04±0.1        | 0.20±0.007    | 0.83±0.1  |
|          | 96       | 1.11±0.07       | 0.21±0.04     | 0.89±0.1  |
|          | 120      | 1.12±0.02       | 0.25±0.05     | 0.88±0.04 |
| D5       | 1        | <0.1%           | <0.1%         | <0.1%     |
|          | 12       | <0.1%           | <0.1%         | <0.1%     |
|          | 24       | <0.1%           | <0.1%         | <0.1%     |
|          | 36       | <0.1%           | <0.1%         | <0.1%     |
|          | 48       | <0.1%           | <0.1%         | <0.1%     |
|          | 72       | <0.1%           | <0.1%         | <0.1%     |
|          | 96       | <0.1%           | <0.1%         | <0.1%     |
|          | 120      | <0.1%           | <0.1%         | <0.1%     |

## Supplementary Experimental Methods

Calculation methods:

$$\text{Consumption of DMDMS } (\%) = \frac{C_{initial} - C_{final}}{C_{initial}} \times 100\%$$

where:

- $C_{initial}$  : The concentration of DMDMS added at the start of the reaction
- $C_{final}$  : The concentration of DMDMS after reaction

$$\text{Cyclic product conversion } (\%) = \frac{X_i \times n_{Di}}{n_{DMDMS,initial}} \times 100\%$$

where:

- $X_i$  : The number of SiMe<sub>2</sub>O units per cyclic species (e.g., 3 for D3 4 for D4, 5 for D5)
- $n_{Di}$ : mol of each cyclic oligomer
- $n_{DMDMS,initial}$ : The total number of moles of DMDMS added to the reaction.

The conversion of hydroxy-terminated PDMS to cyclic oligomers (e.g., D3, D4, D5):

$$\text{Cyclic product conversion } (\%) = \frac{X_i \times n_{Di}}{n_{SiMe_2O,initial}} \times 100\%$$

Where:

- $X_i$  : The number of SiMe<sub>2</sub>O units in that species (3 for D3, 4 for D4, 5 for D5)
- $n_{Di}$ : The number of moles of each cyclic species (e.g., D3, D4, D5)
- $n_{SiMe_2O,initial}$  : The total initial number of moles of SiMe<sub>2</sub>O units in the HO-PDMS substrate
